# Supplementary material for: Realignment of tRNA Variable Loops, the 3-31 nt Minihelix Theorem and Consequences for the Origin of Life
Source: Preprints.org preprint supplement (doi:10.20944/preprints202209.0189.v1), 2022-09-14
Supplement: Supplementary file 1 [file Supplementary_File_1.docx]

**Realignment of variable loops of tRNAs, the 3-31 nt minihelix theorem and consequences for the origin of life**

Lei Lei 1, Zachary Frome Burton 2,*

1 School of Biological Sciences, University of New England, Biddeford, ME, USA 04005; llei@une.edu

2 Department of Biochemistry and Molecular Biology, Michigan State University, E. Lansing, MI, USA 48824-1319; burton@msu.edu

***** Correspondence: burton@msu.edu; 1-517-881-2243

Supplementary File #1: Archaeal tRNALeu. A collection of tRNALeu sequences from Archaea. V loop sequences are highlighted in yellow. TDNA sequences were obtained from the tRNA database (<http://trnadb.bioinf.uni-leipzig.de/> ).

>tdbD00006674|Aeropyrum_pernix_K1|272557|Leu|CAA

GCGGGGGTGCCCGAGCCAGGGCGAAGGGGGCGGGCTCAAGACCCGTTGGCGTAGGCCGGC GTGGGTTCAAATCCCACCCCCCGCACC-

T(((****)))**C

>tdbD00006675|Aeropyrum_pernix_K1|272557|Leu|CAG

GCGGGGGTGCCCGAGCCTGGCCAAAGGGGTCGGGCTCAGGACCCGATGGCGTAGGCCTGC GTGGGTTCAAATCCCACCCCCCGCACC-

T(((****)))**C

>tdbD00006676|Aeropyrum_pernix_K1|272557|Leu|GAG

GCGGGGGTGCCCGAGCCTGGCCAAAGGGGTCGGGCTGAGGACCCGATGGCGTAGGCCTGC GTGGGTTCAAATCCCACCCCCCGCACC-

T(((****)))**C

>tdbD00006677|Aeropyrum_pernix_K1|272557|Leu|TAA

GCGGGGGTGCCCGAGCCTGGCCAAAGGGGGCGGGCTTAAGACCCGTTGGCGTAGGCCTGC GTGGGTTCAAATCCCACCCCCCGCACC-

T(((****)))**C

>tdbD00006678|Aeropyrum_pernix_K1|272557|Leu|TAG

GCGGGGGTGCCCGAGCCTGGCCAAAGGGGTCGGGCTTAGGACCCGATGGCGTAGGCCTGC GTGGGTTCAAATCCCACCCCCCGCACC-

T(((****)))**C

>tdbD00001487|Archaeoglobus_fulgidus|2234|Leu|CAA

GCGGGGGTTGCCGAGT--GGCCAAAGGCGGTGGACTCAAGATCCACTCCCGTAGGGGTTC GAGGGTTCGAATCCCTCCCCCCGCA---

T(((****)))**C

>tdbD00001486|Archaeoglobus_fulgidus|2234|Leu|CAG

GCGGGGGTTGCCGAGC--GGACAAAGGCGCGGGATTCAGGGTCCCGTCCCGTAGGGGTTC GAGGGTTCGAATCCCTCCCCCCGCA---

T(((****)))**C

>tdbD00001485|Archaeoglobus_fulgidus|2234|Leu|GAG

GCGGGGGTTGCCGAGC--GGACAAAGGCGCAGGATTGAGGGTCCTGTCCCGTAGGGGTTC GAGGGTTCGAATCCCTCCCCCCGCA---

T(((****)))**C

>tdbD00001488|Archaeoglobus_fulgidus|2234|Leu|TAA

GCGGGGGTTGCCGAGCCAGGAA-AAGGCGCAGGGCTTAAGACCCTGTCCCGAAGGGGTCC GCGGGTTCGAATCCCGCCCCCCGCA---

T(((****)))**C

>tdbD00001484|Archaeoglobus_fulgidus|2234|Leu|TAG

GCGGGGGTTGCCGAGC--GGCCAAAGGCGCTGGATTTAGGGTCCAGTCCCGTAGGGGTTC GAGGGTTCGAATCCCTCCCCCCGCA---

T(((****)))**C

>tdbD00006679|Archaeoglobus_fulgidus_DSM_4304|224325|Leu|CAA

GCGGGGGTTGCCGAGT--GGCCAAAGGCGGTGGACTCAAGATCCACTCCCGTAGGGGTTC GAGGGTTCGAATCCCTCCCCCCGCA---

T(((****)))**C

>tdbD00006680|Archaeoglobus_fulgidus_DSM_4304|224325|Leu|CAG

GCGGGGGTTGCCGAGC--GGACAAAGGCGCGGGATTCAGGGTCCCGTCCCGTAGGGGTTC GAGGGTTCGAATCCCTCCCCCCGCA---

T(((****)))**C

>tdbD00006681|Archaeoglobus_fulgidus_DSM_4304|224325|Leu|GAG

GCGGGGGTTGCCGAGC--GGACAAAGGCGCAGGATTGAGGGTCCTGTCCCGTAGGGGTTC GAGGGTTCGAATCCCTCCCCCCGCA---

T(((****)))**C

>tdbD00006682|Archaeoglobus_fulgidus_DSM_4304|224325|Leu|TAA

GCGGGGGTTGCCGAGCCAGGAA-AAGGCGCAGGGCTTAAGACCCTGTCCCGAAGGGGTCC GCGGGTTCGAATCCCGCCCCCCGCA---

T(((****)))**C

>tdbD00006683|Archaeoglobus_fulgidus_DSM_4304|224325|Leu|TAG

GCGGGGGTTGCCGAGC--GGCCAAAGGCGCTGGATTTAGGGTCCAGTCCCGTAGGGGTTC GAGGGTTCGAATCCCTCCCCCCGCA---

T(((****)))**C

>tdbD00001489|Haloarcula_marismortui|2238|Leu|CAG

GCAGGGATAGCCAAGTTTGGCCAACGGCGCAGCGTTCAGGGCGCTGTCCCGTAGGGGTCC GCAGGTTCAAATCCTGCTCCCTGCA---

T(((****)))**C

>tdbD00006684|Halobacterium_sp._NRC-1|64091|Leu|CAA

GCGAGGGTAGCCAAGCTCGGCCAACGGCGACGGACTCAAGATCCGTTCTCGTAGGAGTTC GAGGGTTCGAATCCCTTCCCTCGCA---

T(((****)))**C

>tdbD00006685|Halobacterium_sp._NRC-1|64091|Leu|CAG

GCAGGGATAGCCAAGTTTGGCCAAAGGCGCAGCGTTCAGGGCGCTGTCCCGTAGGGGTTC GCAGGTTCAAATCCTGCTCCCTGCA---

T(((****)))**C

>tdbD00006686|Halobacterium_sp._NRC-1|64091|Leu|GAG

GCGTGGGTAGCCGAGCTAGGTCAAAGGCGCAGCGTTGAGGGCGCTGTCCTGTAGAGGTTC GCCGGTTCGAATCCGGTCCCACGCA---

T(((****)))**C

>tdbD00006687|Halobacterium_sp._NRC-1|64091|Leu|TAA

GCGAGGGTGGCCGAGC--GGCCAAAGGCGGCGGGCTTAAGACCCGCTCCCGTAGGGGTTC GTGGGTTCGAATCCCACCTCTCGCA---

T(((****)))**C

>tdbD00006688|Halobacterium_sp._NRC-1|64091|Leu|TAG

GCGCGGGTAGCCAAGCCAGGAA-ACGGCGTAGCGCTTAGGACGCTATCCCGTAGGGGTCC GCCGGTTCAAATCCGGTCCCGCGCA---

T(((****)))**C

>tdbD00001491|Methanocaldococcus_jannaschii|2190|Leu|GAG

GCGGGGGTCGCCAAGCCAGGTCAAAGGCGCCAGATTGAGGGTCTGGTCCCGTAGGGGTTC GCGGGTTCAAATCCCGTCCCCCGCA---

T(((****)))**C

>tdbD00001492|Methanocaldococcus_jannaschii|2190|Leu|TAA

GCAGGGGTCGCCAAGCCTGGCCAAAGGCGCCGGACTTAAGATCCGGTCCCGTAGGGGTTC GGGGGTTCAAATCCCCTCCCCTGCA---

T(((****)))**C

>tdbD00001490|Methanocaldococcus_jannaschii|2190|Leu|TAG

GCAGGGGTCGCCAAGCCTGGCCAAAGGCGCTGGGCCTAGGACCCAGTCCCGTAGGGGTTC CAGGGTTCAAATCCCTGCCCCTGCA---

T(((****)))**C

>tdbD00006692|Methanocaldococcus_jannaschii_DSM_2661|243232|Leu|GAG

GCGGGGGTCGCCAAGCCAGGTCAAAGGCGCCAGATTGAGGGTCTGGTCCCGTAGGGGTTC GCGGGTTCAAATCCCGTCCCCCGCACC-

T(((****)))**C

>tdbD00006693|Methanocaldococcus_jannaschii_DSM_2661|243232|Leu|TAA

GCAGGGGTCGCCAAGCCTGGCCAAAGGCGCCGGACTTAAGATCCGGTCCCGTAGGGGTTC GGGGGTTCAAATCCCCTCCCCTGCACC-

T(((****)))**C

>tdbD00006694|Methanocaldococcus_jannaschii_DSM_2661|243232|Leu|TAG

GCAGGGGTCGCCAAGCCTGGCCAAAGGCGCTGGGCCTAGGACCCAGTCCCGTAGGGGTTC CAGGGTTCAAATCCCTGCCCCTGCACC-

T(((****)))**C

>tdbD00011867|Methanococcus_aeolicus_Nankai-3|419665|Leu|GAG

GCGGGGGTTGCCAAGCCTGGCCAAAGGCGCTAGGTTGAGGGCCTAGTCTCATAGGAGTTC GAGGGTTCGAATCCCTTCCCCCGCA---

T(((****)))**C

>tdbD00011850|Methanococcus_aeolicus_Nankai-3|419665|Leu|TAA

GCAGGGGTTGCCAAGCCTGGCCAACGGCGCTGGACTTAAGATCCAGTCTCATAGGAGTTC GGGGGTTCAAATCCCTTCCCCTGCA---

T(((****)))**C

>tdbD00011857|Methanococcus_aeolicus_Nankai-3|419665|Leu|TAG

GCAGGGGTTGTCGAGCCTGGCCAAAGACGCAGGACTTAGAATCCTGTCCTATAGTGGTTC CAGGGTTCAAATCCCTGCCCCTGCA---

T(((****)))**C

>tdbD00006695|Methanococcus_maripaludis|39152|Leu|GAG

GCGAGGGTTGCCAAGCCTGGTTAAAGGCGCTAGGTTGAGGGCCTAGTCTCATAGGAGTTC GAGGGTTCGAATCCCTTCCCTCGC----

T(((****)))**C

>tdbD00006696|Methanococcus_maripaludis|39152|Leu|TAA

GGAGGGATTGCCAAGCCTGGTCAAAGGCGTCGGACTTAAGATCCGATCCGGTAGCGGTTC GAGGGTTCAAATCCCTTTCCCTCC----

T(((****)))**C

>tdbD00006697|Methanococcus_maripaludis|39152|Leu|TAG

GCAGGGGTTGTCGAGCCTGGCCAAAGATGCAGGACTTAGAATCCTGTCCAGTAGTGGTTC CAGGGTTCAAATCCCTGCCCCTGCA---

T(((****)))**C

>tdbD00006698|Methanococcus_maripaludis|39152|Leu|TAG

GCAGGGGTTGTCGAGCCTGGCCAAAGATGCAGGACTTAGAATCCTGTCCAGTAGTGGTTC CAGGGTTCAAATCCCTGCCCCTGCA---

T(((****)))**C

>tdbD00001493|Methanococcus_vannielii|2187|Leu|TAG

GCAGGGGTTGTCGAGCCTGGCCAAAGATGCAGGACTTAGAATCCTGTCCAGTAGTGGTTC CAGGGTTCAAATCCCTGCCCCTGCA---

T(((****)))**C

>tdbD00001495|Methanopyrus_kandleri|2320|Leu|GAG

GCGGGGGCGCCCGAGCCTGGTCAAAGGGGCGGGAATGAGGATCCCGTGGCCGTAGGGCGTC CCGGGTTCAAATCCCGGCCCCCGCACCA

T*(((****)))**C

>tdbD00006901|Methanopyrus_kandleri_AV19|190192|Leu|GAG

GCGGGGGCGCCCGAGCCTGGTCAAAGGGGCGGGAATGAGGATCCCGTGGCCGTAGGGCCGTCCCGGGTTCAAATCCCGGCCCCCGCACCA

T((((****))))**C

>tdbD00006900|Methanopyrus_kandleri_AV19|190192|Leu|TAA

GCGGGGGCGCCCGAGCCTGGTCGAAGGGGGCGGACTTAAGATCCGCTGGCCGTAGGGCCGTCCCGGGTTCAAATCCCGGCCCCCGCACCA

T((((****))))**C

>tdbD00006902|Methanopyrus_kandleri_AV19|190192|Leu|TAG

GCGGGGGCGCCCGAGCCTGGTCAAAGGGGCGGGACTTAGGATCCCGTGGCCGTAGGGCCGTCCCGGGTTCAAATCCCGGCCCCCGCACCA

T((((****))))**C >tdbD00011888|Methanosarcina_acetivorans_C2A|188937|Leu|CAA

GCGGGAGTAACCAAGC--GGTCAACGGTGGCAGACTCAAGATCTGTTCGTGCAGACGTTC AGGGGTTCGAATCCCTTCTCCCGCA---

T(((****)))**C

>tdbD00011893|Methanosarcina_acetivorans_C2A|188937|Leu|CAG

GCGAGAGTTGCCCAGCCAGGTCAAAGGCGCCAGGTTCAGAGCCTGGTCTTGTAGGAGTTC GTGCGTTCGAATCGCACCTCTCGCA---

T(((****)))**C

>tdbD00011883|Methanosarcina_acetivorans_C2A|188937|Leu|GAG

GCGAGGGTTGCCCAGCCAGGTCAAAGGCGCTAGGTTGAGGGCCTAGTTTCGTAGGAATTC GTGGGTTCGAATCCCATCCCTCGCACCA

T(((****)))**C

>tdbD00011884|Methanosarcina_acetivorans_C2A|188937|Leu|GAG

GCGAGGGTTGCCCAGCCAGGTCAAAGGCGCTAGGTTGAGGGCCTAGTTTCGTAGGAATTC GTGGGTTCGAATCCCATCCCTCGCA---

T(((****)))**C

>tdbD00011916|Methanosarcina_acetivorans_C2A|188937|Leu|TAA

GCGAGGGTTGCCCAGCCAGGCCAAAGGCGCCAGACTTAAGATCTGGTATCGAAGGATTTC GTGGGTTCGAATCCCACCCCTCGCA---

T(((****)))**C

>tdbD00011907|Methanosarcina_acetivorans_C2A|188937|Leu|TAG

GCGAGGGTTGCCCAGCTAGGTCAAAGGCGATGGGCTTAGGACCCATTTTCGTAGGAATTC GTGCGTTCGAATCGCACCCCTCGCA---

T(((****)))**C

>tdbD00006832|Methanosarcina_mazei_Go1|192952|Leu|CAA

GCGGGAGTAACCAAGC--GGTCAACGGTGGCAGACTCAAGATCTGTTCGTGCAGACGTTC AGGGGTTCGAATCCCTTCTCCCGCA---

T(((****)))**C

>tdbD00006833|Methanosarcina_mazei_Go1|192952|Leu|CAG

GCGAGAGTTGCCCAGCCAGGTCAAAGGCGCCAGGTTCAGAGCCTGGTCTTGTAGGAGTTC GTGCGTTCGAATCGCACCTCTCGCA---

T(((****)))**C

>tdbD00006834|Methanosarcina_mazei_Go1|192952|Leu|GAG

GCGAGGGTTGCCCAGCCAGGTCAAAGGCGCTAGGTTGAGGGCCTAGTTTCGTAGGAATTC GTGGGTTCGAATCCCATCCCTCGCA---

T(((****)))**C

>tdbD00006835|Methanosarcina_mazei_Go1|192952|Leu|GAG

GCGAGGGTTGCCCAGCCAGGTCAAAGGCGCTAGGTTGAGGGCCTAGTCTTGTAGGAGTTC GTGGGTTCGAATCCCATCCCTCGCACCA

T(((****)))**C

>tdbD00006836|Methanosarcina_mazei_Go1|192952|Leu|TAA

GCGAGGGTTGCCCAGCCAGGCCAAAGGCGTCGGACTTAAGATCCGATATCGAAGGATTTC GTGGGTTCGAATCCCACCCCTCGCA---

T(((****)))**C

>tdbD00006837|Methanosarcina_mazei_Go1|192952|Leu|TAG

GCGAGGGTTGCCCAGCCAGGTCAAAGGCGATGGGCTTAGGACCCATTTTCGTAGGAATTC GTGCGTTCGAATCGCACCCCTCGCA---

T(((****)))**C

>tdbD00011964|Methanospirillum_hungatei_JF-1|323259|Leu|CAA

GCGGGGATAGCCAAGT--GGTCAAAGGCGAACGCCTCAAGAGCGTTTCTCGTAGGAGTTC AGGGGTTCGACTCCCTTTCCCCGCA---

T(((****)))**C

>tdbD00011972|Methanospirillum_hungatei_JF-1|323259|Leu|CAG

GCGAGGATCGCCGAGCCAGGTCAAAGGCGTTAGGTTCAGGGCCTAATCCCGTAGGGGTTC GCCGGTTCAAATCCGGCTCCTCGCA---

T(((****)))**C

>tdbD00011960|Methanospirillum_hungatei_JF-1|323259|Leu|GAG

GCGAGGGTATCCGAGCCAGGTCAAAGGAGCAAGGTTGAGGGCCTTGTCGCGAAGGCGTTC GAGCGTTCAAATCGCTTCCCTCGCA---

T(((****)))**C

>tdbD00011930|Methanospirillum_hungatei_JF-1|323259|Leu|TAA

GCGAGGGTACCAAAGCCTGGCCAAATGGGCCGGACTTAAGATCCGGTTTCGAAGGAATCC AAGGGTTCAAATCCCTTCCCTCGCA---

T(((****)))**C

>tdbD00011947|Methanospirillum_hungatei_JF-1|323259|Leu|TAG

GCGAGGATTGCCGAGCCAGGTCAAAGGCGACGGATTTAGGGTCCGTTCCCGAAGGGGTCC GGGTGTTCAAATCGCCCTCCTCGCA---

T(((****)))**C

>tdbD00006689|Methanothermobacter_thermautotrophicus_str._Delta_H|187420|Leu|GAG

GCAGGGGTGGTCGAGC--GGTCAAAGGCGCTAGGTTGAGGGCCTAGTGGGGGAGTCCCTTC GCGGGTTCGAATCCCGTCCCCTGCA---

T*(((****)))**C

>tdbD00006690|Methanothermobacter_thermautotrophicus_str._Delta_H|187420|Leu|TAA

GCAGGGGTGCCCGAGC--GGCCAAAGGGGGAGGACTTAAGATCCTCTGGCGCAGGCCTTC GAGGGTTCGAATCCCTTCCCCTGCA---

T(((****)))**C

>tdbD00006691|Methanothermobacter_thermautotrophicus_str._Delta_H|187420|Leu|TAG

GCGGGGGTGCCCGAGCT-GGCCAAAGGGGACAGGCTTAGGACCTGTTGGCGTAGGCCTAC CAGGGTTCGAATCCCTGCCCCCGCA---

T(((****)))**C

>tdbD00001494|Methanothermus_fervidus|2180|Leu|TAG

GCGGGGGTGCCCGAGT--GGTCAAAGGGGACAGGCTTAGGACCTGTTGGCGTTAGGCTTC CAGGGTTCGAATCCCTGCCCCCGCA---

T(((****)))**C

>tdbD00011983|Nanoarchaeum_equitans_Kin4-M|228908|Leu|CAA

GCGGCCGTGCCCGAGC--GGTCGAAGGGGTCGGGCTCAAGACCCGATGGGTTAGTCCCGTC CGGGGTTCGAATCCCCGCGGCCGCA---

T(((*****)))**C

>tdbD00011990|Nanoarchaeum_equitans_Kin4-M|228908|Leu|GAG

GCGGCCGTGCCCGAGC--GGACAAAGGGGCCAGGTTGAGGTCCTGGTGGGGTAGTCCCTGC CGGGGTTCGAATCCCCGCGGCCGCA---

T(((*****)))**C

>tdbD00011997|Nanoarchaeum_equitans_Kin4-M|228908|Leu|TAA

GCGGCCGTGCCCGAGCT-GGCCAAAGGGGTCGGGCTTAAGACCCGATGGGGTAGTCCCTGC CGGGGTTCGAATCCCCGCGGCCGCA---

T(((*****)))**C

>tdbD00011978|Nanoarchaeum_equitans_Kin4-M|228908|Leu|TAG

GCGGCCGTGCCCGAGC--GGTCGAAGGGGTCGGGCTTAGGACCCGATGGGTTAGTCCCGTC CGGGGTTCGAATCCCCGCGGCCGCA---

T(((*****)))**C

>tdbD00006699|Pyrobaculum_aerophilum_str._IM2|178306|Leu|CAA

GCGGGGGTGCCCGAGCCAGGCCAAAGGGGCAGGGCTCAAGACCCTGTGGCGTAGGCCTGC GTGGGTTCAAATCCCACCCCCCGCACCA

T(((****)))**C

>tdbD00006700|Pyrobaculum_aerophilum_str._IM2|178306|Leu|CAG

GCGGGGGTGCCCGAGCCAGGTCAAAGGGGCAGGGTTCAGGTCCCTGTGGCGTAGGCCTGC GTGGGTTCAAATCCCACCCCCCGCACCA

T(((****)))**C

>tdbD00006701|Pyrobaculum_aerophilum_str._IM2|178306|Leu|GAG

GCGGGGGTGCCCGAGCCAGGTCAAAGGGGCAGGGTTGAGGTCCCTGTGGCGTAGGCCTGC GTGGGTTCAAATCCCACCCCCCGCACCA

T(((****)))**C

>tdbD00006702|Pyrobaculum_aerophilum_str._IM2|178306|Leu|TAA

GCGGGGGTGCCCGAGCCAGGTCAAAGGGGCAGGGCTTAAGACCCTGTGGCGTAGGCCTGC GTGGGTTCAAATCCCACCCCCCGCACCA

T(((****)))**C

>tdbD00006703|Pyrobaculum_aerophilum_str._IM2|178306|Leu|TAG

GCGGGGGTGCCCGAGCCAGGTCAAAGGGGCAGGGTTTAGGTCCCTGTGGCGTAGGCCTGC GTGGGTTCAAATCCCACCCCCCGCACCA

T(((****)))**C

>tdbD00006704|Pyrococcus_abyssi_GE5|272844|Leu|CAA

GCGGGGGTTGCCGAGCCTGGTCAAAGGCGGGGGACTCAAGATCCCCTCCCGTAGGGGTTC CGGGGTTCAAATCCCCGCCCCCGCACC-

T(((****)))**C

>tdbD00006705|Pyrococcus_abyssi_GE5|272844|Leu|CAG

GCGGGGGTTGCCGAGCCTGGTCAAAGGCGCGGGATTCAGGGTCCCGTCCCGTAGGGGTTC CGGGGTTCAAATCCCCGCCCCCGCACC-

T(((****)))**C

>tdbD00006706|Pyrococcus_abyssi_GE5|272844|Leu|GAG

GCGGGGGTTGCCGAGCCTGGTCAAAGGCGCGGGATTGAGGGTCCCGTCCCGTAGGGGTTC CGGGGTTCAAATCCCCGCCCCCGCACC-

T(((****)))**C

>tdbD00006707|Pyrococcus_abyssi_GE5|272844|Leu|TAA

GCGGGGGTGCCCGAGCCTGGCCAAAGGGGCCGGACTTAAGATCCGGTGCCGTAGGCTGC GCGGGTTCGAATCCCGCCCCCCGCACC-

T(((***)))**C

>tdbD00006708|Pyrococcus_abyssi_GE5|272844|Leu|TAG

GCGGGGGTTGCCGAGCCTGGCCAAAGGCGCGGGATTTAGGGTCCCGTCCCGTAGGGGTTC CGGGGTTCAAATCCCCGCCCCCGCACC-

T(((****)))**C

>tdbD00006709|Pyrococcus_furiosus_DSM_3638|186497|Leu|CAA

GCGGGGGTTGCCGAGCCTGGTCAAAGGCGGGGGACTCAAGATCCCCTCCCGTAGGGGTTC CGGGGTTCAAATCCCCGCCCCCGCACC-

T(((****)))**C

>tdbD00006710|Pyrococcus_furiosus_DSM_3638|186497|Leu|CAG

GCGGGGGTTGCCGAGCCTGGTCAAAGGCGCGGGATTCAGGGTCCCGTCCCGTAGGGGTTC CGGGGTTCAAATCCCCGCCCCCGCACC-

T(((****)))**C

>tdbD00006711|Pyrococcus_furiosus_DSM_3638|186497|Leu|GAG

GCGGGGGTTGCCGAGCCTGGTCAAAGGCGCGGGATTGAGGGTCCCGTCCCGTAGGGGTTC CGGGGTTCAAATCCCCGCCCCCGCACC-

T(((****)))**C

>tdbD00006712|Pyrococcus_furiosus_DSM_3638|186497|Leu|TAA

GCGGGGGTGCCCGAGCCTGGCCAAAGGGGCCGGACTTAAGATCCGGTGCCGTAGGGCTGC GCGGGTTCGAATCCCGCCCCCCGCACC-

T(((****)))**C

>tdbD00006713|Pyrococcus_furiosus_DSM_3638|186497|Leu|TAG

GCGGGGGTTGCCGAGCCTGGTCAAAGGCGCGGGATTTAGGGTCCCGTCCCGTAGGGGTTC CGGGGTTCAAATCCCCGCCCCCGCACC-

T(((****)))**C

>tdbD00006714|Pyrococcus_horikoshii_OT3|70601|Leu|CAA

GCGGGGGTTGCCGAGCCTGGTCAAAGGCGGGGGACTCAAGATCCCCTCCCGTAGGGGTTC CGGGGTTCGAATCCCCGCCCCCGCACCA

T(((****)))**C

>tdbD00006715|Pyrococcus_horikoshii_OT3|70601|Leu|CAG

GCGGGGGTTGCCGAGCCTGGTCAAAGGCGCGGGATTCAGGGTCCCGTCCCGTAGGGGTTC CGGGGTTCAAATCCCCGCCCCCGCACCA

T(((****)))**C

>tdbD00006716|Pyrococcus_horikoshii_OT3|70601|Leu|GAG

GCGGGGGTTGCCGAGCCTGGTCAAAGGCGCGGGATTGAGGGTCCCGTCCCGTAGGGGTTC CGGGGTTCAAATCCCCGCCCCCGCACCA

T(((****)))**C

>tdbD00006717|Pyrococcus_horikoshii_OT3|70601|Leu|TAA

GCGGGGGTGCCCGAGCCTGGCCAAAGGGGCCGGACTTAAGATCCGGTGCCGTAGGGCTGC GCGGGTTCGAATCCCGCCCCCCGCACCA

T(((****)))**C

>tdbD00006718|Pyrococcus_horikoshii_OT3|70601|Leu|TAG

GCGGGGGTTGCCGAGCCTGGTCAAAGGCGCGGGATTTAGGGTCCCGTCCCGTAGGGGTTC CGGGGTTCAAATCCCCGCCCCCGCACCA

T(((****)))**C

>tdbD00012052|Staphylothermus_marinus_F1|399550|Leu|CAA

GCGGGGGTGCCCGAGCCAGGTTAAAGGGGGCGGACTCAAGATCCGCTGGCGTAGGCCTGC GTGGGTTCAAATCCCACCCCCCGCACCA

T(((****)))**C

>tdbD00012014|Staphylothermus_marinus_F1|399550|Leu|CAG

GCGGGGGTGCCCGAGCATGGTCAAAGGGGTCGGGCTCAGGACCCGATGGCGTAGGCCTGC GTGGGTTCAAATCCCACCCCCCGCACCA

T(((****)))**C

>tdbD00012021|Staphylothermus_marinus_F1|399550|Leu|GAG

GCGGGGGTGCCCGAGCCTGGTCAAAGGGGCCGGGTTGAGGACCCGGTGGCGTAGGCCTGC GTGGGTTCAAATCCCACCCCCCGCACCA

T(((****)))**C

>tdbD00012026|Staphylothermus_marinus_F1|399550|Leu|TAA

GCGGGGGTGCCCGAGCCTGGTCAAAGGGGGCGGACTTAAGATCCGCTGGCGTAGGCCTGC GTGGGTTCAAATCCCACCCCCCGCACCA

T(((****)))**C

>tdbD00012053|Staphylothermus_marinus_F1|399550|Leu|TAG

GCGGGGGTGCCCGAGCCTGGTCAAAGGGGTCGGGCTTAGGACCCGATGGCGTAGGCCTGC GTGGGTTCAAATCCCACCCCCCGCACCA

T(((****)))**C

>tdbD00012068|Sulfolobus_acidocaldarius_DSM_639|330779|Leu|CAA

GCGGGGGTGCCCGAGCT-GGTCAAAGGGGGCGGACTCAAGATCCGCTGGCGAAGGCCTAC GCGGGTTCAAATCCCGTCCCCCGCA---

T(((****)))**C

>tdbD00012061|Sulfolobus_acidocaldarius_DSM_639|330779|Leu|CAG

GCGGGGGTGCCCGAGCAAGGTCAAAGGGGTCGGGCTCAGGCCCCGATGGTGTAGGCCTGC GTGGGTTCAAATCCCACCCCCCGCA---

T(((****)))**C

>tdbD00012066|Sulfolobus_acidocaldarius_DSM_639|330779|Leu|GAG

GCGGGGGTGCCCGAGCAAGGTCAAAGGGGGCGGACTGAGGCTCCGCTGGTGTAGGCCTGC GTGGGTTCAAGTCCCACCCCCCGCA---

T(((****)))**C

>tdbD00012059|Sulfolobus_acidocaldarius_DSM_639|330779|Leu|TAA

GCGGGGGTGCCCGAGCA-GGTCAAAGGGGGCGGACTTAAGATCCGCTGGCGTAGGCCTGC GTGGGTTCAAATCCCACCCCCCGCA---

T(((****)))**C

>tdbD00012082|Sulfolobus_acidocaldarius_DSM_639|330779|Leu|TAG

GCGGGGGTGCCCGAGCAAGGTCAAAGGGGTCGGGCTTAGGCCCCGATGGTGTAGGCCTGC GTGGGTTCAAATCCCACCCCCCGCA---

T(((****)))**G

>tdbD00001496|Sulfolobus_solfataricus|2287|Leu|CAG

GCGGGGGTGCCCGAGCAAGGTCAAAGGGGTCGGGCTCAGGCCCCGATGGTGTAGGCCTGC GTGGGTTCAAATCCCACCCCCCGCA---

T(((****)))**C

>tdbD00006719|Sulfolobus_solfataricus_P2|273057|Leu|CAA

GCGGGGGTGCCCGAGCT-GGTCAAAGGGGGCGGACTCAAGATCCGCTGGCGAAGGCCTTC GCGGGTTCAAATCCCGTCCCCCGC----

T(((****)))**C

>tdbD00006720|Sulfolobus_solfataricus_P2|273057|Leu|CAG

GCGGGGGTGCCCGAGCTAGGTCGAAGGGGGTAGGCTCAGGCCCTACTGGTGAAGGCCTTC GCGGGTTCAAATCCCGCCCCCCGC----

T(((****)))**C

>tdbD00006721|Sulfolobus_solfataricus_P2|273057|Leu|GAG

GCGGGGGTGCCCGAGCTAGGGCAAAGGGGGCGGACTGAGGCTCCGCTGGCGAAGGCCTGC ACGGGTTCAAATCCCGTCCCCCGC----

T(((****)))**C

>tdbD00006722|Sulfolobus_solfataricus_P2|273057|Leu|TAA

GCGGGGGTGCCCGAGCCTGGTCAAAGGGGGCGGACTTAAGATCCGCTGGCGAAGGCCTGC ACGGGTTCAAATCCCGTCCCCCGC----

T(((****)))**C

>tdbD00006723|Sulfolobus_solfataricus_P2|273057|Leu|TAG

GCGGGGGTGCCCGAGCTAGGTCAAAGGGGGCAGGCTTAGGCCCTGCTGGCGAAGGCCTGC ACGGGTTCAAATCCCGTCCCCCGC----

T(((****)))**C
