# Supplementary material for: Realignment of tRNA Variable Loops, the 3-31 nt Minihelix Theorem and Consequences for the Origin of Life
Source: Preprints.org preprint supplement (doi:10.20944/preprints202209.0189.v1), 2022-09-14
Supplement: Supplementary file 2 [file Supplementary_File_2.docx]

Realignment of variable loops of tRNAs, the 3-31 nt minihelix theorem and consequences for the origin of life

Lei Lei 1, Zachary Frome Burton 2,*

1 School of Biological Sciences, University of New England, Biddeford, ME, USA 04005; llei@une.edu

2 Department of Biochemistry and Molecular Biology, Michigan State University, E. Lansing, MI, USA 48824-1319; burton@msu.edu

***** Correspondence: burton@msu.edu; 1-517-881-2243

Supplementary File #2: Archaeal tRNASer. A collection of tRNASer sequences from Archaea (<http://trnadb.bioinf.uni-leipzig.de/> ). V loop sequences are highlighted in yellow.

>tdbD00009775|Aeropyrum_pernix_K1|272557|Ser|CGA

GCCGGGGTGGCCGAGC--GGCCCAAGGCGGCGGGCTCGAGACCCGTTGCCCCGCGAGGGGCGC GCGGGTTCGAATCCCGCCCCCGGCGCC-

T(((((****)))))*C

>tdbD00009776|Aeropyrum_pernix_K1|272557|Ser|GCT

GCCGCGGTCGCCTAGCCTGGCC-AGGGCGCCGGCCTGCTAAGCCGGTGGGGGAGACCCCGC GCGGGTTCAAATCCCGCCCGCGGCGCC-

T((((****))))*C

>tdbD00009777|Aeropyrum_pernix_K1|272557|Ser|GGA

GCCGGGGTGCCCGAGC--GGTCCAAGGGGACGGGCTGGAGACCCGTTGCCCCGCGAGGGGCGC GCGGGTTCGAATCCCGCCCCCGGCGCC-

T(((((****)))))*C

>tdbD00009778|Aeropyrum_pernix_K1|272557|Ser|TGA

GCCGGGGTGGCCGAGC--GGCCCAAGGCGGCGGGCTTGAGACCCGTTGCCCCGCGAGGGGCGC GCGGGTTCGAATCCCGCCCCCGGCGCC-

T(((((****)))))*C

>tdbD00002606|Archaeoglobus_fulgidus|2234|Ser|CGA

GCCGGGGTTGCAGAGCCAGGCC-ACTGCGGGAGACTCGAGATCTCCTGCCCGAAAGGGCGC GTGGGTTCGAATCCCACCCCCGGCG---

T((((****))))*C

>tdbD00002604|Archaeoglobus_fulgidus|2234|Ser|GCT

GCCGGGGTTGCCGAGC--GGT--AAGGCGACGGCCTGCTAAGCCGTTGGGCGTTGCCCGC GTGGGTTCGAATCCCACCCCCGGCG---

T((((***))))*C

>tdbD00002607|Archaeoglobus_fulgidus|2234|Ser|GGA

GCCGGGGTTGCCGAGC--GGT--AAGGCGCACGCCTGGAGAGCGTGTGGGCGTTCGCCCGC GTGGGTTCGAATCCCACCCCCGGCG---

T((((****))))*C

>tdbD00002605|Archaeoglobus_fulgidus|2234|Ser|TGA

GCCGGGGTTGCAGAGA--GGT--ACTGCGCCAGCCTTGAGAGCTGGTGCCCGTAAGGGCTC CTGGGTTCAAATCCCAGCCCCGGCG---

T((((****))))*C

>tdbD00009779|Archaeoglobus_fulgidus_DSM_4304|224325|Ser|CGA

GCCGGGGTTGCAGAGCCAGGCC-ACTGCGGGAGACTCGAGATCTCCTGCCCGAAAGGGCGC GTGGGTTCGAATCCCACCCCCGGCG---

T((((****))))*C

>tdbD00009780|Archaeoglobus_fulgidus_DSM_4304|224325|Ser|GCT

GCCGGGGTTGCCGAGC--GGT--AAGGCGACGGCCTGCTAAGCCGTTGGGCGTTGCCCGC GTGGGTTCGAATCCCACCCCCGGCG---

T((((***))))*C

>tdbD00009781|Archaeoglobus_fulgidus_DSM_4304|224325|Ser|GGA

GCCGGGGTTGCCGAGC--GGT--AAGGCGCACGCCTGGAGAGCGTGTGGGCGTTCGCCCGC GTGGGTTCGAATCCCACCCCCGGCG---

T((((****))))*C

>tdbD00009782|Archaeoglobus_fulgidus_DSM_4304|224325|Ser|TGA

GCCGGGGTTGCAGAGA--GGT--ACTGCGCCAGCCTTGAGAGCTGGTGCCCGTAAGGGCTC CTGGGTTCAAATCCCAGCCCCGGCG---

T((((****))))*C

>tdbD00002608|Haloarcula_marismortui|2238|Ser|GCT

GTCGTGGTAGCCAAGCCTGGCCCAAGGCGCAGGGTTGCTAACTCTGTGGCGTACAGCCTC CGGGGTTCGAATCCCCGCCACGACG---

T(((*****)))*C

>tdbD00009783|Halobacterium_sp._NRC-1|64091|Ser|CGA

GCCGAGGTAGCCTAGCCTGGCC-AAGGCGGTTGCTTCGAGAGCAACTGTCCACACGGACTC AGGAGTTCAAATCTCCTCCTCGGCG---

T((((****))))*C

>tdbD00009784|Halobacterium_sp._NRC-1|64091|Ser|GCT

GTCGTGGTAGCCTAGCCTGGTC-AAGGCGCAGGGTTGCTAACTCTGTGGCGTAAGCCTC CGGGGTTCAAATCCCCGCCACGACG---

T(((****)))*C

>tdbD00009785|Halobacterium_sp._NRC-1|64091|Ser|GGA

GCCGGGATGGCCGAAT--GGC--AAAGCGCACGCCTGGAAAGCGTGTCCCCTTACGGGGTT CAGGGTTCAAATCCCTGTCCCGGCG---

T((((****))))*T

>tdbD00009786|Halobacterium_sp._NRC-1|64091|Ser|TGA

GGTGAGGTGGCAGAGC--GGCCTATTGCGCCGGTCTTGAAAACCGGTGGCGTCACGCCTC CTGGGTTCGAATCCCAGCCTCACCG---

T((((***))))*C

>tdbD00002609|Methanocaldococcus_jannaschii|2190|Ser|GCT

GCGGGGGTGGCCCAGCCTGGT--ACGGCGTGGGACTGCTAATCCCATTGGGCAACGCCCAGC CCGGGTTCAAGTCCCGGCCCCCGCG---

T(((((***)))))*C

>tdbD00002611|Methanocaldococcus_jannaschii|2190|Ser|GGA

GCGGAGGTAGCCTAGCCCGGCC-AAGGCGTGGGACTGGAGATCCCATGGGCTTTGCCCGC GGGGGTTCAAATCCCCCCCTCCGCG---

T((((***))))*C

>tdbD00002610|Methanocaldococcus_jannaschii|2190|Ser|TGA

GCAGGGGTAGCCAAGCCAGGACTACGGCGCTGGACTTGAGATCCAGTGGGGCTTTGCCCCGC CTGGGTTCAAATCCCAGCCCCTGCG---

T(((((***)))))*C

>tdbD00009790|Methanocaldococcus_jannaschii_DSM_2661|243232|Ser|GCT

GCGGGGGTGGCCCAGCCTGGT--ACGGCGTGGGACTGCTAATCCCATTGGGCAACGCCCAGC CCGGGTTCAAGTCCCGGCCCCCGCG---

T(((((***)))))*C

>tdbD00009791|Methanocaldococcus_jannaschii_DSM_2661|243232|Ser|GGA

GCGGAGGTAGCCTAGCCCGGCC-AAGGCGTGGGACTGGAGATCCCATGGGGCTTTGCCCCGC GGGGGTTCAAATCCCCCCCTCCGCGCC-

T(((((***)))))*C

>tdbD00009792|Methanocaldococcus_jannaschii_DSM_2661|243232|Ser|TGA

GCAGGGGTAGCCAAGCCAGGACTACGGCGCTGGACTTGAGATCCAGTGGGGCTTTGCCCCGC CTGGGTTCAAATCCCAGCCCCTGCGCC-

T(((((***)))))*C

>tdbD00011846|Methanococcus_aeolicus_Nankai-3|419665|Ser|GCT

GCGGAGATGGCCCAGTCTGGT--ACGGCGCGGGACTGCTAATCCCGTTGGGCTTTGCCCAAC CCGAGTTCAAATCTCGGTCTCCGCG---

T(((((***)))))*C

>tdbD00011871|Methanococcus_aeolicus_Nankai-3|419665|Ser|GGA

GCAGAGATAGTCTAGCTCGGT--AAGGCGTGGGACTGGAAATCCCATGGGGCTTTGCTCCGC GGGGGTTCAAATCCCCCTCTCTGCG---

T(((((***)))))*C

>tdbD00011870|Methanococcus_aeolicus_Nankai-3|419665|Ser|TGA

GCAGAGGTGGTCGAGCTTGGACTATGGCGCCGGACTTGAAATCCGGTGGAGCTTTGCTCCGC AAGGGTTCAAATCCCTTCCTCTGCG---

T(((((***)))))*C

>tdbD00009793|Methanococcus_maripaludis|39152|Ser|GCT

GCGGAGATGGCCCAGTCTGGT--ACGGCGCGGGACTGCTAATCCCGTTACGCTCTGCGTAAC CCGAGTTCAAATCTCGGTCTCCGC----

T(((((***)))))*C

>tdbD00009794|Methanococcus_maripaludis|39152|Ser|GGA

GCAGAGATAGTCTAGCCTGGG--AAGGCGTACGGCTGGAAACCGTATGAGGCTTTGCCTCCC GGGGGTTCAAATCCCCCTCTCTGCGCC-

T(((((***)))))*C

>tdbD00009795|Methanococcus_maripaludis|39152|Ser|TGA

GCAGAGGTGGTTGAGCTTGGCCAAAGGCGCCGGACTTGAAATCCGGTTCTCCACTGGGGAGC GGGGGTTCAAATCCCTCCCTCTGC----

T(((((***)))))*C

>tdbD00002613|Methanopyrus_kandleri|2320|Ser|TGA

GCCGGGGCGGCCGAGCCCGGTCCAAGGCGCGGGACTTGAGATCCCGTGGCCCGTATGGGCCGC CCGGGTTCAAATCCCGGCCCCGGCGCCA

T(((((****)))))*C

>tdbD00009966|Methanopyrus_kandleri_AV19|190192|Ser|GCT

GCCGGGGCGGCCGAGCCCGGTCCAAGGCGCGGGACTGCTAATCCCGTGGCCCGTATGGGCCGC CCGGGTTCAAATCCCGGCCCCGGCGCCA

T(((((****)))))*C

>tdbD00009965|Methanopyrus_kandleri_AV19|190192|Ser|GGA

GCCGGGGCGGCCGAGCCCGGTCCAAGGCGCGGGATTGGAGATCCCGTGGCCCGTATGGGCCGC CCGGGTTCAAATCCCGGCCCCGGCGCCA

T(((((****)))))*C

>tdbD00009964|Methanopyrus_kandleri_AV19|190192|Ser|TGA

GCCGGGGCGGCCGAGCCCGGTCCAAGGCGCGGGACTTGAGATCCCGTGGCCCGTATGGGCCGC CCGGGTTCAAATCCCGGCCCCGGCGCCA

T(((((****)))))*C

>tdbD00011920|Methanosarcina_acetivorans_C2A|188937|Ser|CGA

GCCCAGGTCGTCTAGT--GGT--ATGGCGACGGTCTCGAAAACCGTTCCCTTTGGGATC GCAGGTTCAAATCCTGCCCTGGGCG---

T(((***)))**C

>tdbD00011896|Methanosarcina_acetivorans_C2A|188937|Ser|GCT

GACGAGATAGCCAAGCCCGGT--ATGGCGTGGGATTGCTAATCCCATGATGCCCTGCATCGC GGGGGTTCGAGTCCCCCTCTCGTCG---

T(((((***)))))*C

>tdbD00011882|Methanosarcina_acetivorans_C2A|188937|Ser|GGA

GCCGAGGTAGTCTAGC--GGT--AGGGCGCAAGCCTGGAAAGCTTGTGGGGCTTAGCCCCTC GGGAGTTCAAATCTCCCCCTCGGCG---

T(((((***)))))*C

>tdbD00011912|Methanosarcina_acetivorans_C2A|188937|Ser|TGA

GCTGAGGTAGCCAAGC--GGACCACGGCGCCGGTCTTGAAAACCGGTAGCGCCACGCGCTAC GGGAGTTCGAATCTCCCCCTCAGCG---

T(((((***)))))*C

>tdbD00009910|Methanosarcina_mazei_Go1|192952|Ser|CGA

GCCCAGGTCGTCTAGC--GGT--ATGGCGACGGTCTCGAAAACCGTTCCCCTTGGGATC GCAGGTTCGAATCCTGCCCTGGGCA---

T(((***)))**C

>tdbD00009911|Methanosarcina_mazei_Go1|192952|Ser|GCT

GACGAGATAGCCAAGCCCGGT--ATGGCGCGGGATTGCTAATCCCGTGATGCTCCGCATCCC GGGGGTTCGAGTCCCCCTCTCGTCG---

T(((((***)))))*C

>tdbD00009912|Methanosarcina_mazei_Go1|192952|Ser|GGA

GCCGAGGTAGTCTAGT--GGT--AGGGCGCAAGCCTGGAAAGCTTGTGGGGCTTAGCCCCTC GGGAGTTCGAATCTCCCCCTCGGCG---

T(((((***)))))*C

>tdbD00009913|Methanosarcina_mazei_Go1|192952|Ser|TGA

GCTGAGGTAGCCAAGC--GGACCACGGCGCCGGTCTTGAAAACCGGTAGCGCTACGCGCTAC GGGAGTTCGAATCTCTCCCTCAGCG---

T(((((***)))))*C

>tdbD00011969|Methanospirillum_hungatei_JF-1|323259|Ser|CGA

GCCGAGGTAGTCTAGTCCGGG--AAGGCGGTGGTCTCGAAAACCACTGGTGGTAACACCTC GGGAGTTCAAATCTCCCCTTCGGCG---

T((((****))))*C

>tdbD00011955|Methanospirillum_hungatei_JF-1|323259|Ser|GCT

GTTGAGGTAGCCAAGCCAGGT--ATGGCGCAGGGTTGCTAACCCTGTGTCCCTTGGGACTC GGGGGTTCAAATCCCTCCCTCAACG---

T(((((**)))))*C

>tdbD00011946|Methanospirillum_hungatei_JF-1|323259|Ser|GGA

GCTGAGGTAGTCTAGTCTGGG--AAGGCGCAAGATTGGAAATCTTGTGGGAGCAATCCCTC GGGAGTTCAAATCTCCCCCTTAGCG---

T((((****))))*C

>tdbD00011936|Methanospirillum_hungatei_JF-1|323259|Ser|TGA

GCCGAGATAGTCTAGTCCGGG--AAGGCGGTGGTCTTGAAAACCACTGGTGGTAACACCTC GGGAGTTCAAATCTCCCTTTCGGCG---

T((((****))))*C

>tdbD00009787|Methanothermobacter_thermautotrophicus_str._Delta_H|187420|Ser|GCT

GCCGGGGTGGCCCAGTCTGGT--ACGGCGTTGGCCTGCTAAGCCAATGATCCTTTGGATCTC GCGGGTTCAAATCCCGTCCCCGGCG---

T(((((***)))))*C

>tdbD00009788|Methanothermobacter_thermautotrophicus_str._Delta_H|187420|Ser|GGA

GCCGGGATAGCCTAGCCAGGT--AAGGCGCAAGACTGGAAATCTTGTGGAGCTTTGCTCCTC CTGGGTTCAAATCCCAGTCCCGGCG---

T(((((***)))))*C

>tdbD00009789|Methanothermobacter_thermautotrophicus_str._Delta_H|187420|Ser|TGA

GCCGGGATAGCCTAGCCAGGT--AAGGCGCGGGACTTGAGATCCCGTGGAGATTCTCTCCGC CTGGGTTCAAATCCCAGTCCCGGCG---

T(((((***)))))*C

>tdbD00002612|Methanothermus_fervidus|2180|Ser|GCT

GCCGGGGTGGCCCAGCCTGGT--AGGGCGTCGGCCTGCTAAGCCGATGATCCGTTAAGGATCGCGCGGGTTCAAATCCCGTCCCCGGCG---

T(((((*****)))))*C

>tdbD00011991|Nanoarchaeum_equitans_Kin4-M|228908|Ser|CGA

GCCGCCGTGCCCGAGC--GGCCCAAGGGGGAGGGCTCGAGACCCTCTCCCCGCCAAGGGGGC GGGGGTTCGAATCCCCCCGGCGGCG---

T((((*****))))*C

>tdbD00011988|Nanoarchaeum_equitans_Kin4-M|228908|Ser|GCT

GCCGCCGTGCCCGAGC--GGTC-AAGGGGCCTGCCTGCTAAGCAGGTCCCCGTATGGGGGC GGGGGTTCGAATCCCCCCGGCGGCG---

T((((****))))*C

>tdbD00012000|Nanoarchaeum_equitans_Kin4-M|228908|Ser|GGA

GCCGCCGTGCCCGAGC--GGACCAAGGGGTTCGGCTGGAGACCGAATCCCCGATAAGGGGGC GGGGGTTCGAATCCCCCCGGCGGCG---

T((((*****))))*C

>tdbD00011984|Nanoarchaeum_equitans_Kin4-M|228908|Ser|TGA

GCCGCCGTGCCCGAGC--GGACCAAGGGGTTCGGCTTGAGACCGAATCCCCGATAAGGGGGC GGGGGTTCGAATCCCCCCGGCGGCG---

T((((*****))))*C

>tdbD00009796|Pyrobaculum_aerophilum_str._IM2|178306|Ser|CGA

GCCGGGGTGGCCGAGC--GGCCCAAGGCGCGGGACTCGAGATCCCGTCCCCGTCCAGGGGGC GTGGGTTCAAATCCCACCCCCGGCG---

T((((*****))))*C

>tdbD00009797|Pyrobaculum_aerophilum_str._IM2|178306|Ser|GCT

GCCGGGGTGGCCGAGTT-GGTCCAAGGCGCGGGCCTGCTAAGCCCGTCCCCATACGGGGGC GTGGGTTCAAATCCCACCCCCGGCG---

T((((****))))*C

>tdbD00009798|Pyrobaculum_aerophilum_str._IM2|178306|Ser|GGA

GCCGGGGTGGCCGAGC--GGCCCAAGGCGCGGGACTGGAGATCCCGTCCCCGTCTAGGGGGC CCGGGTTCAAATCCCGGCCCCGGCG---

T((((*****))))*C

>tdbD00009799|Pyrobaculum_aerophilum_str._IM2|178306|Ser|TGA

GCCGGGGTGGCCGAGC--GGCCCAAGGCGCGGGACTTGAGATCCCGTCCCCGTCCAGGGGGC GTGGGTTCAAATCCCACCCCCGGCGCCA

T((((*****))))*C

>tdbD00009800|Pyrococcus_abyssi_GE5|272844|Ser|CGA

GCCGGGGTAGCCTAGCCAGGG--AAGGCGCGGGACTCGAGATCCCGTGGGCGTTCGCCCAC CGGGGTTCAAATCCCCGCCCCGGCGCC-

T((((****))))*C

>tdbD00009801|Pyrococcus_abyssi_GE5|272844|Ser|GCT

GCCGCGGTAGCCTAGCCTGGT--AGGGCGCCGGCCTGCTAAGCCGGTGGGCGTGGTCCCGC CGGGGTTCAAATCCCCGCCGCGGCGCC-

T(((******)))*C

>tdbD00009802|Pyrococcus_abyssi_GE5|272844|Ser|GGA

GCCGGGGTAGCCTAGCCAGGG--AAGGCGCGGGCCTGGAGAGCCCGTGGGCGTTCGCCCAC CGGGGTTCAAATCCCCGCCCCGGCGCC-

T(((((**)))))*C

>tdbD00009803|Pyrococcus_abyssi_GE5|272844|Ser|TGA

GCCGGGATAGCCTAGCCTGGT--AGGGCGCGGGCCTTGAGAGCCCGTGGGCGTTTGCCCGC CGGGGTTCAAATCCCCGTCCCGGCGCC-

T((((****))))*C

>tdbD00009804|Pyrococcus_furiosus_DSM_3638|186497|Ser|CGA

GCCGGGGTAGCCTAGTCAGGG--AAGGCGCGGGACTCGAGATCCCGTGGGCGTTCGCCCGC CGGGGTTCAAATCCCCGCCCCGGCGCC-

T(((((**)))))*C

>tdbD00009805|Pyrococcus_furiosus_DSM_3638|186497|Ser|GCT

GCCGCGGTAGCCTAGCCTGGT--AGGGCGCCGGCCTGCTAAGCCGGTGGGCGTGGTCCCGC CGGGGTTCAAATCCCCGCCGCGGCGCC-

T(((((***))))*C

>tdbD00009806|Pyrococcus_furiosus_DSM_3638|186497|Ser|GGA

GCCGGGGTAGCCTAGCCAGGG--AAGGCGCGGGCCTGGAGAGCCCGTGGGCGTTCGCCCAC CGGGGTTCAAATCCCCGCCCCGGCGCC-

T(((((**)))))*C

>tdbD00009807|Pyrococcus_furiosus_DSM_3638|186497|Ser|TGA

GCCGGGATAGCCTAGCCTGGT--AGGGCGCGGGCCTTGAGAGCCCGTGGGCGTTTGCCCGC CGGGGTTCAAATCCCCGTCCCGGCGCC-

T((((****))))*C

>tdbD00009808|Pyrococcus_horikoshii_OT3|70601|Ser|CGA

GCCGGGGTAGCCTAGCCTGGG—-AAGGCGCGGGACTCGAGATCCCGTGGGCGTGGTCCCAC CGGGGTTCAAATCCCCGCCCCGGCGCCA

T(((******)))*C

>tdbD00009809|Pyrococcus_horikoshii_OT3|70601|Ser|GCT

GCCGCGGTAGCCTAGCCTGGT—-AGGGCGCCGGCCTGCTAAGCCGGTGGGCGTGGTCCCGC CGGGGTTCAAATCCCCGCCGCGGCGCCA

T(((******)))*C

>tdbD00009810|Pyrococcus_horikoshii_OT3|70601|Ser|GGA

GCCGGGGTAGCCTAGCCTGGG—-AAGGCGCGGGCCTGGAGAGCCCGTGGGCGTTTGCCCAC CGGGGTTCAAATCCCCGCCCCGGCGCCA

T((((****))))*C

>tdbD00009811|Pyrococcus_horikoshii_OT3|70601|Ser|TGA

GCCGGGATAGCCTAGCCTGGT—-AGGGCGCGGGCCTTGAGAGCCCGTGGGCGTTTGCCCGC CGGGGTTCAAATCCCCGTCCCGGCGCCA

T((((****))))*C

>tdbD00012015|Staphylothermus_marinus_F1|399550|Ser|CGA

GCCGGGGTGCCCGAGC—-GGACTAAGGGGGTAGGCTCGAGACCTACTGCCCCGCGGAGGGGCGCGCGGGTTCGAATCCCGCCCCCGGCGCCA

T(((((*****)))))*C

>tdbD00012028|Staphylothermus_marinus_F1|399550|Ser|GCT

GCCGGGGTCGCCTAGCCTGGT--AGGGCGCCGGCCTGCTAAGCCGGTGGGGTGGTTCCCCGC GCGGGTTCAAATCCCGCCCCCGGCG---

T((((*****))))*C

>tdbD00012025|Staphylothermus_marinus_F1|399550|Ser|GGA

GCCGGGGTGCCCGAGC—-GGACTAAGGGGCTGGCCTGGAGAGCCAGTGCCCCATACGGGGCGC GCGGGTTCGAATCCCGCCCCCGGCGCCA

T(((((****)))))*C

>tdbD00012031|Staphylothermus_marinus_F1|399550|Ser|TGA

GCCGGGGTGCCCGAGC—-GGTCTAAGGGGCTGGCCTTGAGAGCCAGTGGGCCAAGGGGCCCGC GCGGGTTCGAATCCCGCCCCCGGCGCCA

T(((((****)))))*C

>tdbD00012060|Sulfolobus_acidocaldarius_DSM_639|330779|Ser|CGA

GCCGGGGTGCCCGAGC--GGACCAAGGGGGTAGGCTCGAGACCTACTGCCTCTCCGAGGCAC GCGGGTTCAAATCCCGCCCCCGGCG---

T(((((***)))))*C

>tdbD00012097|Sulfolobus_acidocaldarius_DSM_639|330779|Ser|GCT

GCCGGGGTCGCCTAGCTCGGT—-AGGGCGGAGGCCTGCTAAGCCTCTGGGGTCCCACCCCGC GCGGGTTCAAATCCCGCCCCCGGCGCCA

T(((((***)))))*C

>tdbD00012088|Sulfolobus_acidocaldarius_DSM_639|330779|Ser|GGA

GCCGGGGTGCCCGAGT--GGACTAAGGGGCTGGCCTGGAGAGCCAGTGTGGATCTTCCACGC GCGGGTTCAAATCCCGCCCCCGGCG---

T(((((***)))))*C

>tdbD00012083|Sulfolobus_acidocaldarius_DSM_639|330779|Ser|TGA

GCCGGGGTGCCCGAGC--GGTCCAAGGGGCTGGCCTTGAGAGCCAGTAGGGTTATCCCTGC GTGGGTTCAAATCCCACCCCCGGCG---

T((((****))))*C

>tdbD00002614|Sulfolobus_solfataricus|2287|Ser|CGA

GCCGGGGTGCCCGAGC--GGACCAAGGGGGTAGGCTCGAGACCTACTGCCTCTCCGAGGCAC GCGGGTTCAAATCCCGCCCCCGGCG---

T(((((***)))))*C

>tdbD00009812|Sulfolobus_solfataricus_P2|273057|Ser|CGA

GCCGGGGTGCCCGAGC--GGTC-AAGGGGGTAGGCTCGAGACCTACTGCCTCTCTGAGGCAC ACGGGTTCGAATCCCGTCCCCGGC----

T(((((***)))))*C

>tdbD00009813|Sulfolobus_solfataricus_P2|273057|Ser|GCT

GCCGAGGTCGCCTAGCCAGGT--AGGGCGGCGGCCTGCTAAGCCGCTGGGGATCCTCCCCAC GCGGGTTCAAATCCCGCCCTCGGC----

T(((((***)))))*C

>tdbD00009814|Sulfolobus_solfataricus_P2|273057|Ser|GGA

GCCGGGGTGCCCGAGC--GGACTAAGGGGCTGGCCTGGAGAGCCAGTGGGGGTTTCCCCGC GCGGGTTCAAATCCCGCCCCCGGC----

T((((****))))*C

>tdbD00009815|Sulfolobus_solfataricus_P2|273057|Ser|TGA

GCCGGGGTGCCCGAGT--GGTCCAAGGGGCTGGCCTTGAGAGCCAGTAGGTGTCTAGCCTGC GCGGGTTCAAATCCCGCCCCCGGC----

T((((*****))))*C

>tdbD00009939|Sulfolobus_tokodaii_str._7|273063|Ser|CGA

GCCGGGGTGCCCGAGC--GGACTAAGGGGGTAGGCTCGAGACCTACTGCCCCTATGGGGCAC GCGGGTTCAAATCCCGCCCCCGGCG---

T(((((***)))))*C

>tdbD00009940|Sulfolobus_tokodaii_str._7|273063|Ser|GCT

GCCGGGGTCGCCTAGCCCGGTT-AGGGCGGCGGCCTGCTAAGCCGCTGGGGTCCGTCCCCGC GCGGGTTCAAATCCCGCCCCCGGCGCCA

T((((*****))))*C

>tdbD00009941|Sulfolobus_tokodaii_str._7|273063|Ser|GGA

GCCGGGGTGCCCGAGC--GGTCTAAGGGGGCGGCCTGGAGAGCCGTTGGGGGTTTCCCCGC GCGGGTTCAAGTCCCGCCCCCGGCG---

T((((****))))*C

>tdbD00009942|Sulfolobus_tokodaii_str._7|273063|Ser|TGA

GCCGGGGTGCCCGAGT--GGACTAAGGGGCTGGCCTTGAGAGCCAGTGGGGATCTCCCCGC GCGGGTTCAAATCCCGCCCCCGGCG---

T((((****))))*C

>tdbD00009816|Thermoplasma_acidophilum_DSM_1728|273075|Ser|CGA

GTCGGGGTAGCCTAGCCCGGT--AAGGCGGTAGACTCGAGATCTACTGCTCTCGTAGCTC GGGAGTTCAAATCTCCCCCCCGACG---

T(((*****)))*C

>tdbD00009817|Thermoplasma_acidophilum_DSM_1728|273075|Ser|GCT

GCGGGGATGGCCCAGA--GGT--AAGGCGGCAGCCTGCTAAGCTGTTTCTCTTATGAGAGC GTGGGTTCGAATCCCACTCCCCGCG---

T((((****))))*C

>tdbD00009818|Thermoplasma_acidophilum_DSM_1728|273075|Ser|GGA

GCTGGGATAGCCTAGCCCGGT--AAGGCGCAGGTCTGGAAAACCTGTGCTCGTATAGAGCTC GGGAGTTCAAATCTCCCTCCCAGCG---

T((((*****))))*C

>tdbD00009819|Thermoplasma_acidophilum_DSM_1728|273075|Ser|TGA

GCCGCGGTGGCCCAGC--GGT--ACGGCGCCAGCCTTGAGAGCTGGTTCCCTTGTGGATC GGGAGTTCGAATCTCCCCCGCGGCG---

T(((*****)))*C

>tdbD00009820|Thermoplasma_volcanium_GSS1|273116|Ser|CGA

GTCGGGGTAGCCTAGCCCGGT--AAGGCGGTAGACTCGAGATCTACTGCTCTCGTAGCTC GGGAGTTCAAATCTCCCCCCCGACG---

T(((*****)))*C

>tdbD00009821|Thermoplasma_volcanium_GSS1|273116|Ser|GCT

GCGGGGATGGCCCAGT--GGT--AAGGCGGCAGCCTGCTAAGCTGTTTCTCGTATGAGAGC GTGGGTTCGAATCCCACTCCCCGCG---

T((((****))))*C

>tdbD00009822|Thermoplasma_volcanium_GSS1|273116|Ser|GGA

GCTGGGATAGCCTAGCCTGGT--AAGGCGCAGGTCTGGAAAACCTGTGCTCATTAGAGCTC GGGAGTTCAAATCTCCCTCCCAGCG---

T((((****))))*C

>tdbD00009823|Thermoplasma_volcanium_GSS1|273116|Ser|TGA

GCCGCGGTGGCCCAGC--GGT--ACGGCGCCAGACTTGAGATCTGGTTCCCTTGTGGATC GGGAGTTCGAATCTCCCCCGCGGCG---

T(((*****)))*C
